# Supplementary material for: Molecular Characterization of a Novel Positive-Sense, Single-Stranded RNA Mycovirus Infecting the Plant Pathogenic Fungus Sclerotinia sclerotiorum
Source: PubMed Central journal article supplement (PMC4452915; doi:10.3390/v7052470), 2015-05-21
Supplement: viruses-07-02470-s001.pdf [file viruses-07-02470-s001.pdf]

## Supplementary Materials

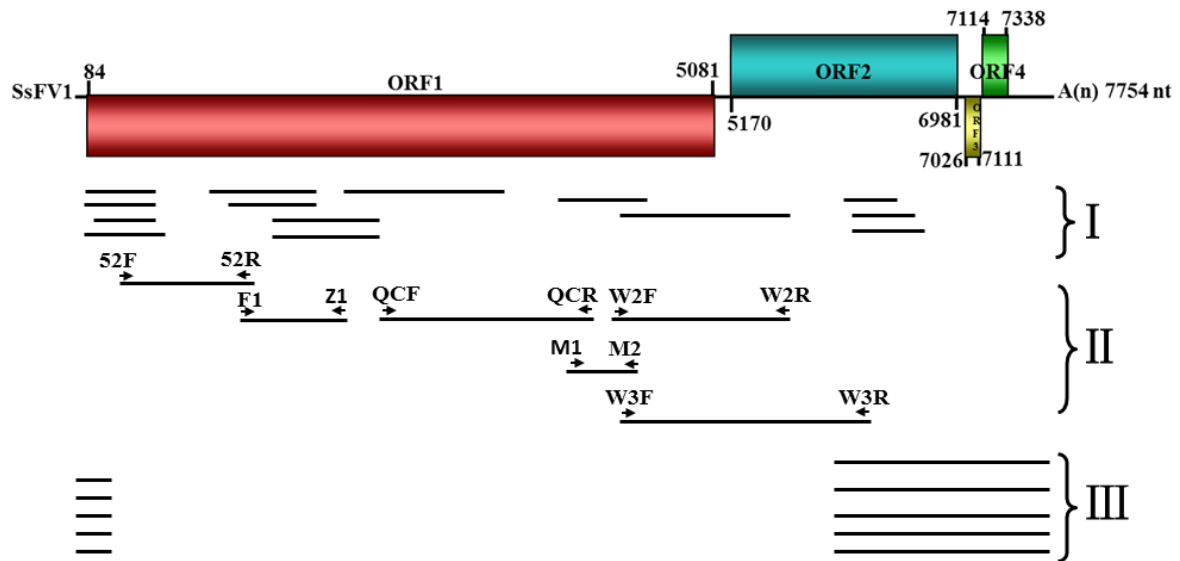

**Figure S1.** Schematic representation of the strategy used for SsFV1 full cDNA sequence. Partial cDNA clones (I) were obtained using tagged random dN6 primers and denatured dsRNA as a template. dsRNA-specific primers (Table S1) were designed based on the sequences of the initial cDNA clones generated by random primers and used in RT-PCR amplification to produce cDNA clones (II) for dsRNA regions that was not covered by the initial cDNA clones. The 5' and 3' terminal clones (III) were synthesized using the RACE method described by Xie *et al.* (2006).

**Table S1.** Oligonucleotide primers/adaptor used in this study.

| Name                                         | Sequence (5' → 3')          | Position in Genome of SsFV1 |
|----------------------------------------------|-----------------------------|-----------------------------|
| To cDNA clone                                |                             |                             |
| 52R                                          | AAATTTGTACCATCTTGTAGCC      | 356–377                     |
| 52F                                          | AAATTTGTACCATCTTGTAGCCAGC   | 1417–1441                   |
| F1                                           | ATCAATGAAGATGGCAAGACAATAA   | 1374–1398                   |
| Z1                                           | TAGAGCCCCTTCCCTTTTTCAT      | 2427–2448                   |
| QCF                                          | ATCATTATGCTGGAGATTGTAC      | 2132–2153                   |
| QCR                                          | CTTTGGTAACTCAATTTCCGTTG     | 4022–4044                   |
| M1                                           | CTTATTTGTGCTGGATGAATCTC     | 3928–3950                   |
| M2                                           | CACCGTTATTAGTGCGACCAGT      | 4454–4475                   |
| W2F                                          | ACGCCTAATTTTACCAGAAATG      | 4399–4421                   |
| W2R                                          | AGGAGCTGCGGCCGCTGCA         | 5461–5482                   |
| W3F                                          | GAAAAGAATTTGACAACCTGAACA    | 4664–4686                   |
| W3R                                          | GGTACAGTTTTGGTTTCCTG        | 6221–6242                   |
| tagged random primers-dN6                    | CGATCGATCATGATGCAATGCNNNNNN |                             |
| Complementary primer for dN6                 | CGATCGATCATGATGCAATGC       |                             |
| To detect cDNA inserts in the pMD18-T vector |                             |                             |
| M13F-47                                      | CGCCAGGGTTTTCCCAGTCACGAC    | pMD18-T                     |
| M13R-48                                      | AGCGGATAACAATTTACACAGGA     | pMD18-T                     |

**Table S2.** The information of viruses or genes used in the present study.

| Virus Name                               | Acronym | RdRp Identities (%) | Helicase Identities (%) | Accession Number | Family          |
|------------------------------------------|---------|---------------------|-------------------------|------------------|-----------------|
| Sclerotinia sclerotiorum fusarivirus 1   | SsFV1   | -                   | -                       | KP842791         |                 |
| Fusarium graminearum dsRNA mycovirus 1   | FgV1    | 133/266 (50%)       | 95/291 (33%)            | AAT07067         |                 |
| Penicillium roqueforti dsRNA mycovirus 1 | PrRV1   | 128/266 (48%)       | 110/320 (34%)           | AI199895         | Fusariviridae   |
| Rosellinia necatrix fusarivirus 1        | RnFV1   | 118/259 (46%)       | 101/294 (34%)           | YP_009047147     |                 |
| Grapevine associated mycovirus-2         | GaMV2   | 124/255(49%)        | -                       | ADO60939         |                 |
| Cryphonectria hypovirus 1                | CHV1    | 63/266 (24%)        | 41/164 (25%)            | NP_041091        |                 |
| Cryphonectria hypovirus 2                | CHV2    | 43/199 (22%)        | 72/295 (24%)            | NP_613266        |                 |
| Cryphonectria hypovirus 3                | CHV3    | 69/199 (35%)        | 77/310 (25%)            | NP_051710        |                 |
| Cryphonectria hypovirus 4                | CHV4    | 84/244 (34%)        | 79/303 (26%)            | YP_138519        |                 |
| Sclerotinia sclerotiorum hypovirus 1     | SsHV1   | 76/244 (31%)        | 90/362 (25%)            | AEL99352         | Hypoviridae     |
| Sclerotinia sclerotiorum hypovirus 2     | SsHV2   | 87/251 (35%)        | 19/71 (27%)             | AIA61616         |                 |
| Fusarium graminearum hypovirus 1         | FgHV1   | 69/234 (29%)        | -                       | YP_009011065     |                 |
| Valsa ceratosperma hypovirus 1           | VcHV1   | 81/244 (33%)        | -                       | BAM08994         |                 |
| Phomopsis longicolla hypovirus 1         | PIHV1   | 77/244 (32%)        | -                       | AIG94930         |                 |
| Potato virus Y                           | PVY     | 49/209 (23%)        | 64/293 (22%)            | NP_056759        |                 |
| Potato virus V                           | PVV     | 48/195 (25%)        | 69/320 (22%)            | NP_659008        |                 |
| Zantedeschia mild mosaic virus           | ZmMV    | 58/209 (28%)        | -                       | YP_002321507     |                 |
| Daphne mosaic virus                      | DMV     | 52/192 (27%)        | 31/149 (21%)            | YP_610949        | Potyviridae     |
| Potato virus A                           | PVA     | 54/211 (26%)        | -                       | NP_659729        |                 |
| Barley mild mosaic virus                 | BmMV    | 47/135 (35%)        | 62/298 (21%)            | NP_734299        |                 |
| Wheat yellow mosaic virus                | WyMV    | 43/126 (34%)        | -                       | CAB59641         |                 |
| Oat mosaic virus                         | OMV     | 41/126 (33%)        | 26/131 (20%)            | NP_734281        |                 |
| Maize chlorotic dwarf virus              | McDV    | 48/208 (23%)        | -                       | NP_734456        |                 |
| Apple latent spherical virus             | ALSV    | 49/190 (26%)        | -                       | NP_734022        |                 |
| Cherry rasp leaf virus                   | CLV     | 47/190 (25%)        | -                       | YP_081454        |                 |
| Satsuma dwarf virus                      | SDV     | 59/218 (27%)        | -                       | NP_734025        | Secoviridae     |
| Chocolate lily virus A                   | CLVA    | 57/225 (25%)        | -                       | YP_004940021     |                 |
| Strawberry mottle virus                  | SMV     | 42/185 (23%)        | 19/82 (23%)             | NP_733954        |                 |
| Black raspberry necrosis virus           | BRNV    | 40/181 (22%)        | 15/55 (27%)             | YP_654561        |                 |
| Vibrio vulnificus                        | -       | -                   | 71/317 (22%)            | NP_761612        | Bacterium       |
| Pseudoalteromonas sp.                    | -       | -                   | 76/338 (22%)            | WP_008133989     | Bacterium       |
| Vibrio owensii                           | -       | -                   | 79/322 (25%)            | WP_039842595     | Bacterium       |
| Schizosaccharomyces cryophilus           | -       | -                   | 78/326 (24%)            | EPY51743         | Yeast           |
| Aliivibrio fischeri                      | -       | -                   | 86/332 (26%)            | WP_005419796     | Bacterium       |
| Saprolegnia diclina VS20                 | -       | -                   | 71/338 (21%)            | XP_008605027     | Saprolegniaceae |
| Photobacterium angustum                  | -       | -                   | 73/316 (23%)            | WP_039872432     | Bacterium       |

“-” means no identities.
